# Supplementary material for: Magnetic structure of a multiferroic compound: Cu2OCl2
Source: Royal Society of Chemistry journal article supplement (doi:10.1039/d4fd00042k), 2024-01-01
Supplement: d4fd00042k1.pdf [file d4fd00042k1.pdf]

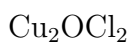

Julien Lévêque,<sup>1,2</sup> Elisa Rebolini,<sup>3</sup> Andrés Saúl,<sup>1,\*</sup> and Marie-Bernadette Lepetit<sup>2,3,†</sup>

<sup>1</sup>*Aix Marseille Univ, CNRS, CINAM, Marseille, France*

<sup>2</sup>*Institut Néel, CNRS, Grenoble, France*

<sup>3</sup>*Institut Laue Langevin, Grenoble, France*

## Supplemental material

### I. FOURIER DECOMPOSITION OF MC SIMULATIONS WITH A $\vec{q} = (0.83, 0, 0)$ PROPAGATION VECTOR

The NN  $J_i$  ( $i = 1, \dots, 3$ ) are taken from the DDCI calculations.

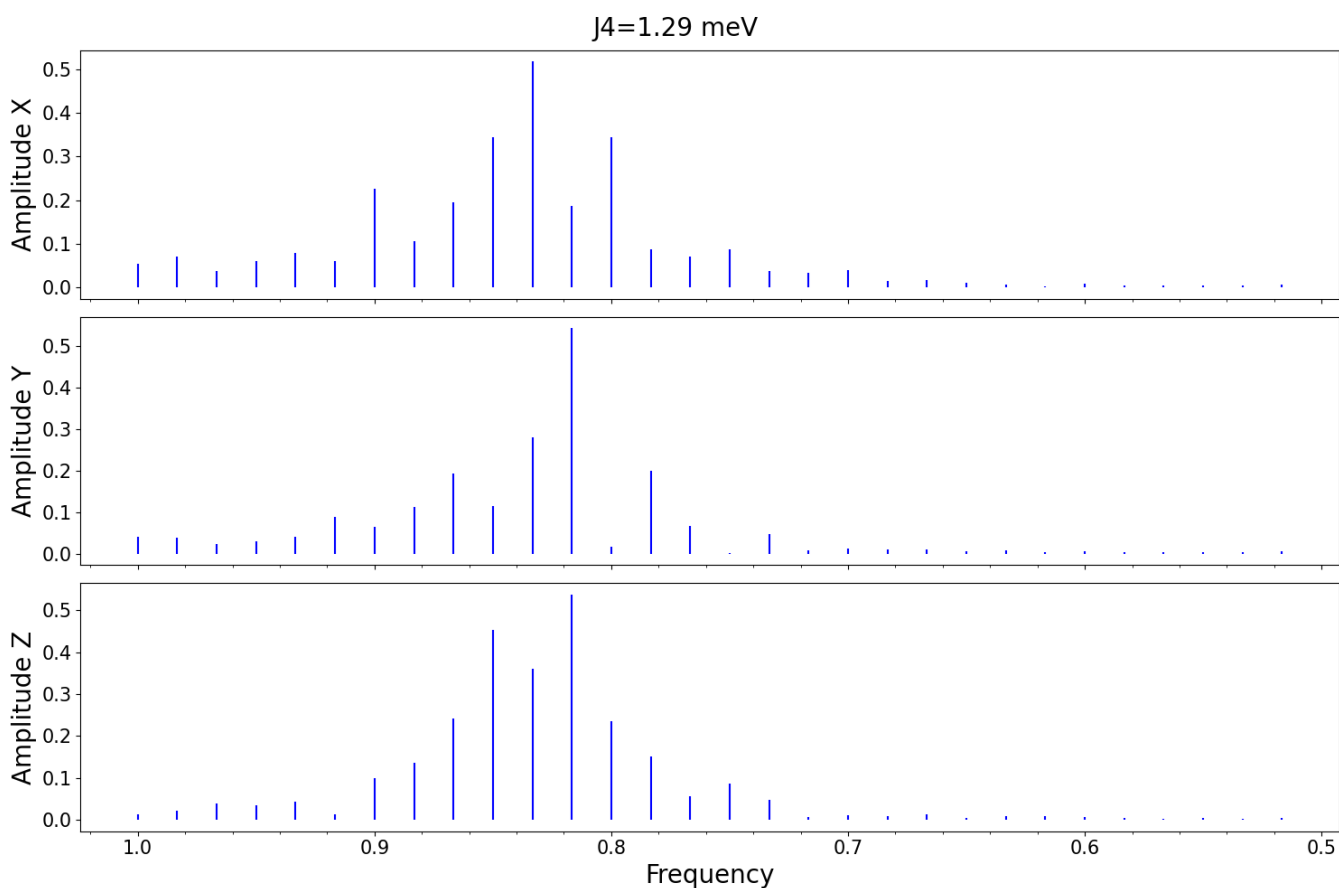

Figure 1: Fourier decomposition of the magnetic structure order obtained from MC simulations within a  $60 \times 60 \times 2$  supercell for  $J_4 = -1.3$ , meV.

\* andres.saul@cnrs.fr

† Marie-Bernadette.Lepetit@neel.cnrs.fr

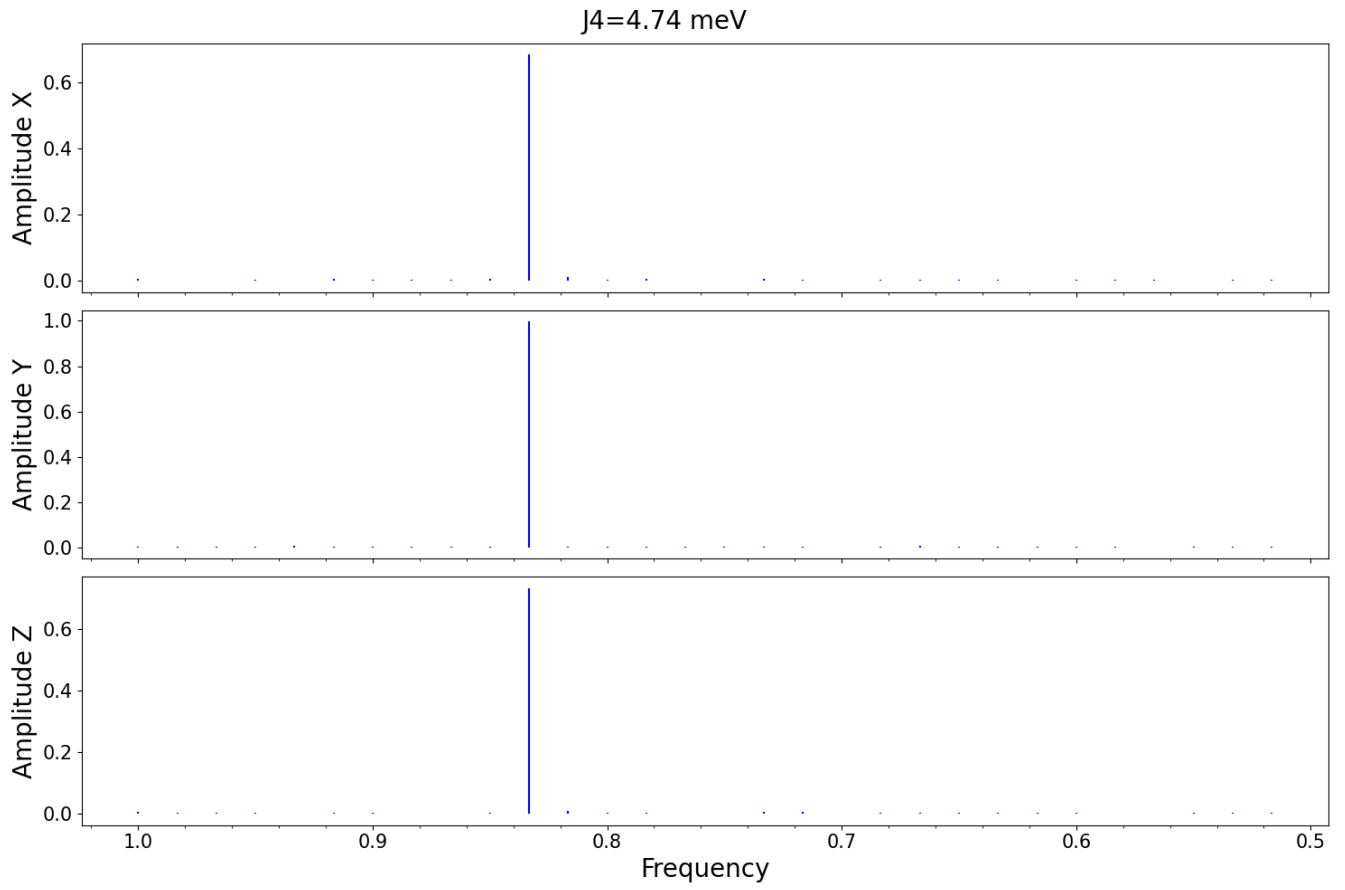

Figure 2: Fourier decomposition of the magnetic structure order obtained from MC simulations within a  $60 \times 60 \times 2$  supercell for  $J_4 = -4.7, \text{ meV}$ .
